# Supplementary material for: Human Papillomavirus Deregulates the Response of a Cellular Network Comprising of Chemotactic and Proinflammatory Genes
Source: PLOS journal article supplement (doi:10.1371/journal.pone.0017848), 2011-03-14

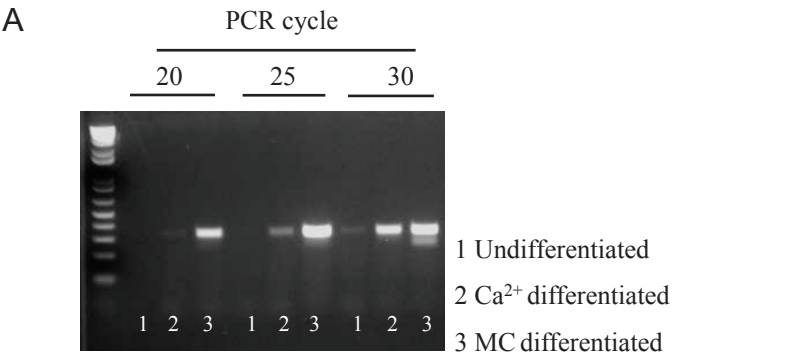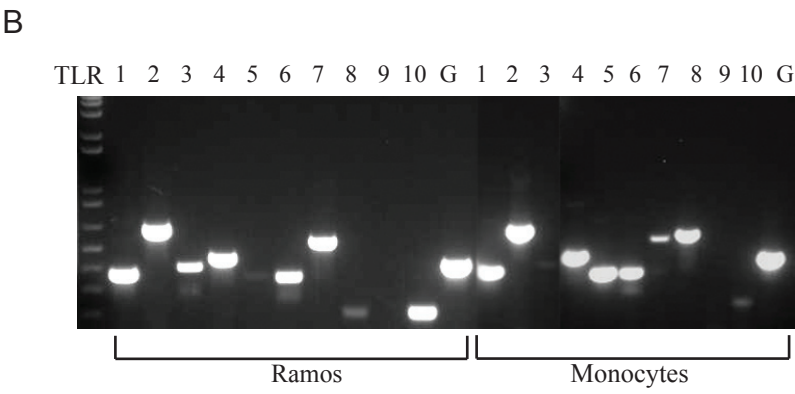

Supplement: S1 (10.1371/journal.pone.0017848.s001) [file journal.pone.0017848.s001]
